# Supplementary material
Source: Royal Society of Chemistry journal article supplement (doi:10.1039/d6cy00114a)
Supplement: d6cy00114a1.pdf [file d6cy00114a1.pdf]

## SUPPORTING INFORMATION

---

# Multifunctional Switch Mediates Catalytic Activity and Product Ratio in Fungal CYP512W2

Hanbing Li<sup>a,#</sup>, Yuhuan Luo<sup>a,#</sup>, Zeqian Du<sup>a</sup>, Jian-Jiang Zhong<sup>a</sup>, Han Xiao<sup>a,\*</sup> and Ting Shi<sup>a,\*</sup>

<sup>a</sup>State Key Laboratory of Microbial Metabolism, and School of Life Sciences & Biotechnology,  
Shanghai Jiao Tong University, 800 Dong-chuan Road, Shanghai, 200240, China

E-mail: Shi, T. (tshi@sjtu.edu.cn); Xiao, H. (smallhan@sjtu.edu.cn).

**Table of Contents**

|                                                                                                                                             |    |
|---------------------------------------------------------------------------------------------------------------------------------------------|----|
| <b>Supporting Figures</b> .....                                                                                                             | 3  |
| <b>Figure S1.</b> The $\Delta\Delta G$ value of all mutations (7x19) calculated by FoldX and I-Mutant. ....                                 | 3  |
| <b>Figure S2.</b> The 46 mutations with $\Delta\Delta G$ value less than -2.0 kcal/mol.....                                                 | 3  |
| <b>Figure S3.</b> Mutations at L294 and I364 with different residue properties was screened .....                                           | 4  |
| <b>Figure S4.</b> The PCA results of C11-HLDOA-WT/I108A/S/G systems .....                                                                   | 5  |
| <b>Figure S5.</b> The active pocket of WT and mutants I108A/S/G.....                                                                        | 6  |
| <b>Figure S6.</b> The PCA results of the substrate GA-Y in WT and mutants I108A/S/G and the corresponding representative conformations..... | 7  |
| <b>Figure S7.</b> Comparative analysis of GA-Y substrate conformation and C15-H $\alpha$ -O angular distribution .....                      | 8  |
| <b>Figure S8.</b> Binding mode of HLDOA substrates in C11-HLDOA-I108N complex and dynamic analysis of key parameters.....                   | 9  |
| <b>Figure S9.</b> The energy decomposition analysis of the C7-HLDOA-I108N complex (a) and the C11-HLDOA-I108N complex (b).....              | 10 |
| <b>Figure S10.</b> The PCA results of the substrate GA-Y in mutant I108N and the PRSs occupancy of C15 site of GA-Y in mutant I108.....     | 11 |
| <b>Figure S11.</b> Computational analysis of the C7 radical intermediate in the I108N mutant. ....                                          | 12 |
| <b>Figure S12.</b> The major cluster conformations of (a) I364C and (b) I364H in complex with substrate HLDOA. ....                         | 13 |
| <b>Figure S13.</b> The yields and product ratios of the combinatorial mutagenesis by shake flask fermentation of strains for 120 h.....     | 13 |
| <b>Supporting Tables</b> .....                                                                                                              | 14 |
| <b>Table S1.</b> The binding energy and C-O(heme) distance of CYP512W2 mutants' dock results .....                                          | 14 |
| <b>Table S2.</b> Construction of plasmids .....                                                                                             | 15 |
| <b>Table S3.</b> Strains used in this study .....                                                                                           | 20 |
| <b>Table S4.</b> Product ratio of Diverse Mutants to Generate GA-Jb and GA-Y .....                                                          | 21 |
| <b>Table S5.</b> The percentage of PRSs in three MD simulations in WT and its variants I108A/S/G.....                                       | 22 |
| <b>Table S6.</b> The binding energy of CYP512W2 mutants calculated by MM/GBSA.....                                                          | 22 |

## Supporting Figures

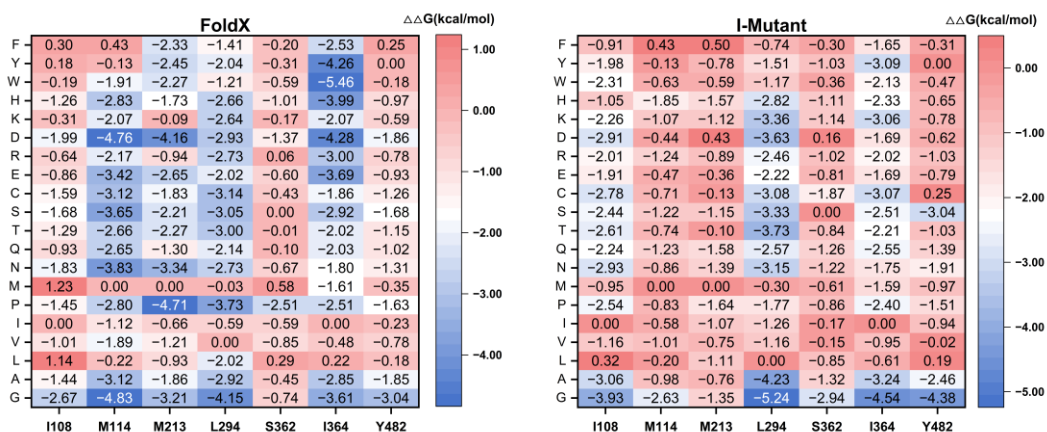

Figure S1. The  $\Delta\Delta G$  value of all mutations (7x19) calculated by FoldX and I-Mutant.

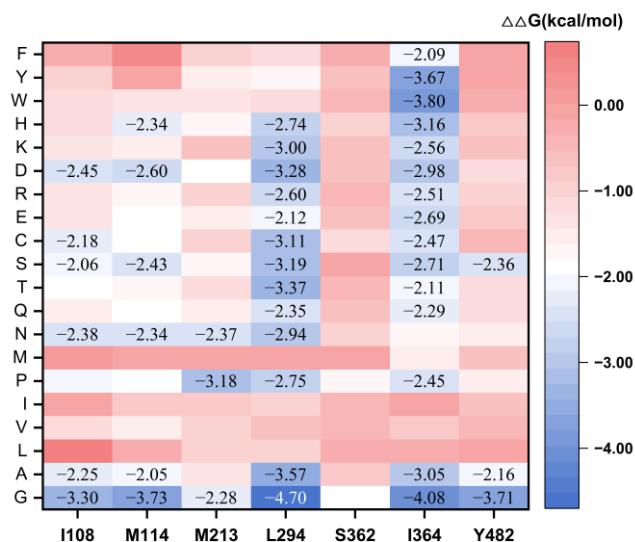

Figure S2. The 46 mutations with  $\Delta\Delta G$  value less than -2.0 kcal/mol.

## SUPPORTING INFORMATION

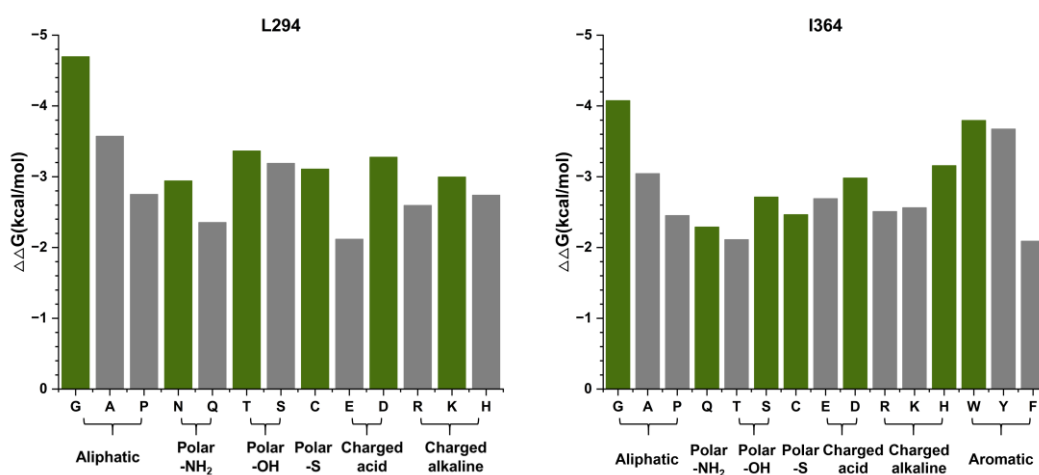

**Figure S3.** Mutations at L294 and I364 site with different residue properties was screened.

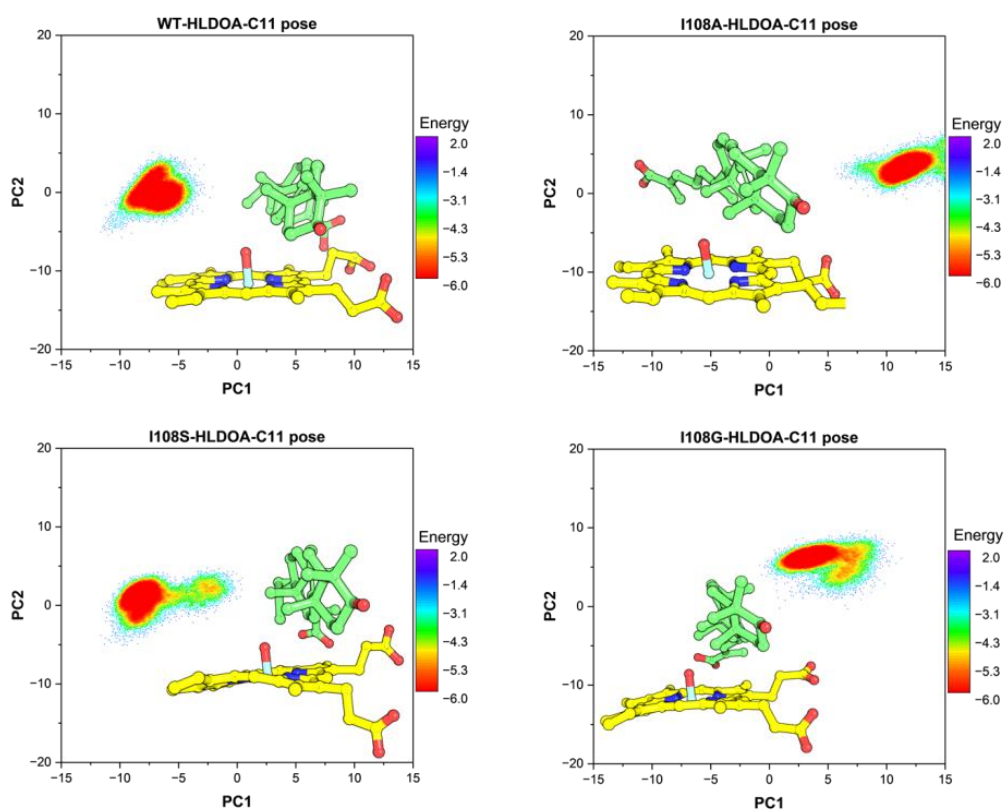

**Figure S4.** The PCA results of C11-HLDOA-WT/I108A/S/G models. The lowest energy conformations in variants I108A/S/G are showed.

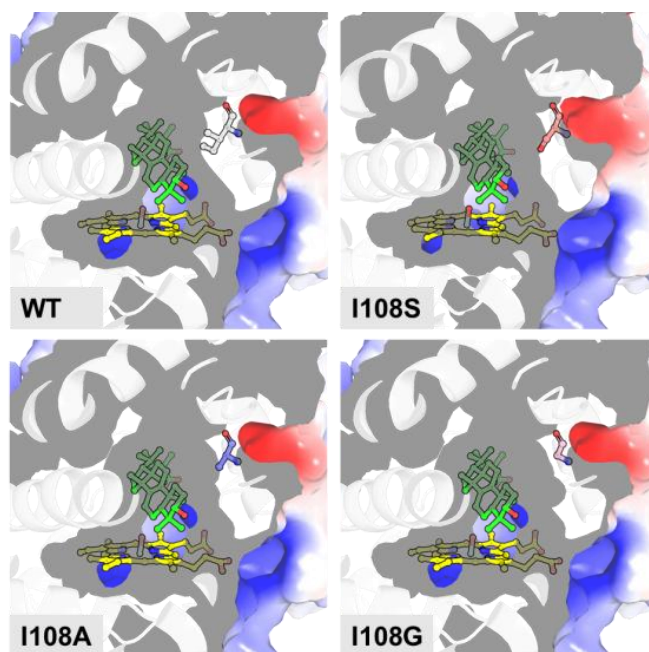

**Figure S5.** The active pocket of WT and variants I108A/S/G. For comparison purposes, all substrate conformations are the initial conformation of the substrates in WT. The pocket volumes enlarge in mutations.

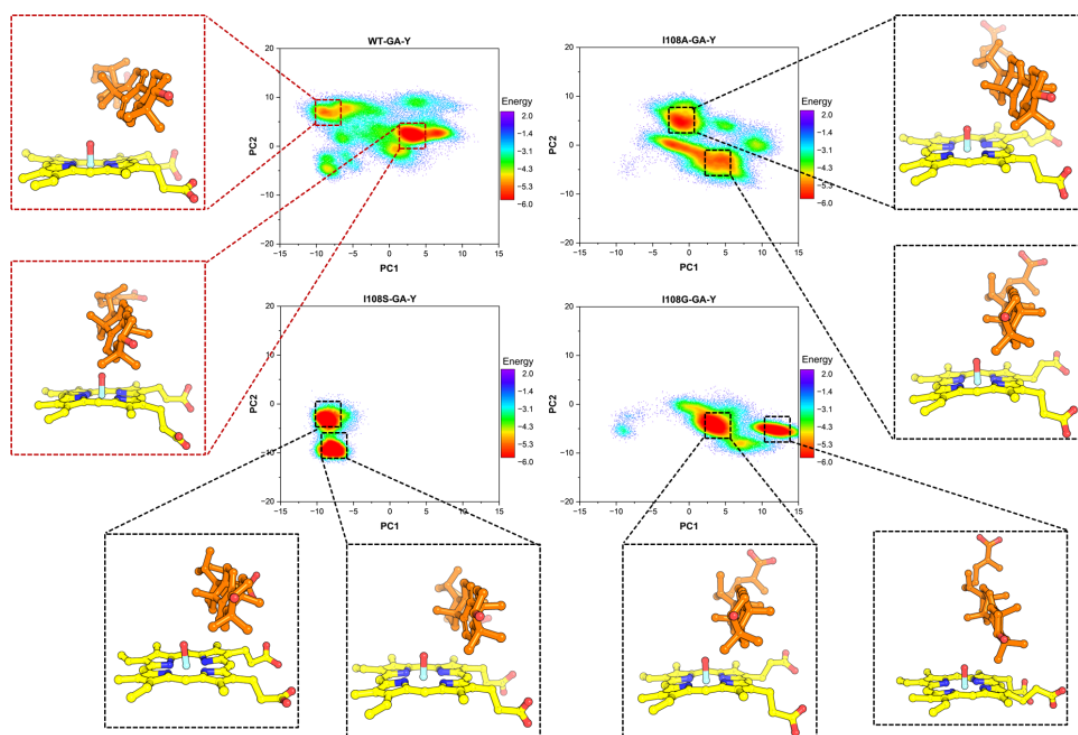

**Figure S6.** The PCA results of the substrate GA-Y in WT and variants I108A/S/G and the corresponding representative conformations (circled by red square in WT and black square in variants I108A/S/G).

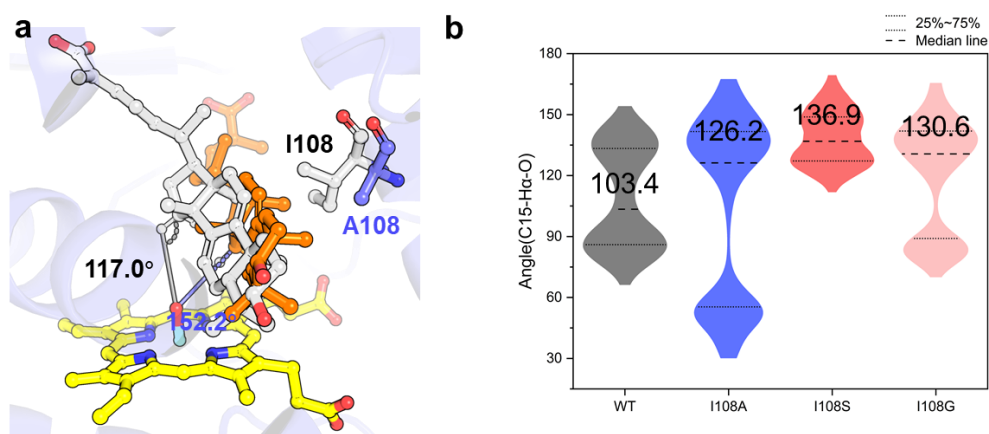

**Figure S7.** Comparative analysis of GA-Y substrate conformation and C15-H $\alpha$ -O angular distribution. (a) The comparison of representative conformations of substrate GA-Y in WT and variant I108A. The H $\alpha$  of C15 site in substrate GA-Y was showed by sticks and the angle (C15-H $\alpha$ -O) was showed by solid line (gray in WT and violet in I108A). (b) Distributions of the angle (C15-H $\alpha$ -O) in the MD simulations of WT and variants I108A/S/G.

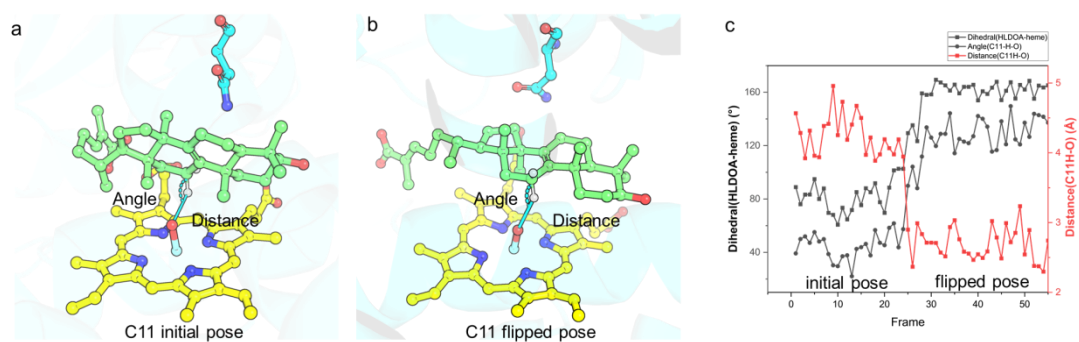

**Figure S8.** Binding mode of HLDOA substrates in C11-HLDOA-I108N model and dynamic analysis of key parameters. (a) The initial binding modes of substrate HLDOA in C11-HLDOA-I108N model. (b) The flipped binding modes of substrate HLDOA in C11-HLDOA-I108N model. (c) Change of the dihedral angle, the angle (C11-H-O) and the distance from C11H to O(-heme) during the first 100 ps in the MD simulations of C11-HLDOA-I108N model.

## SUPPORTING INFORMATION

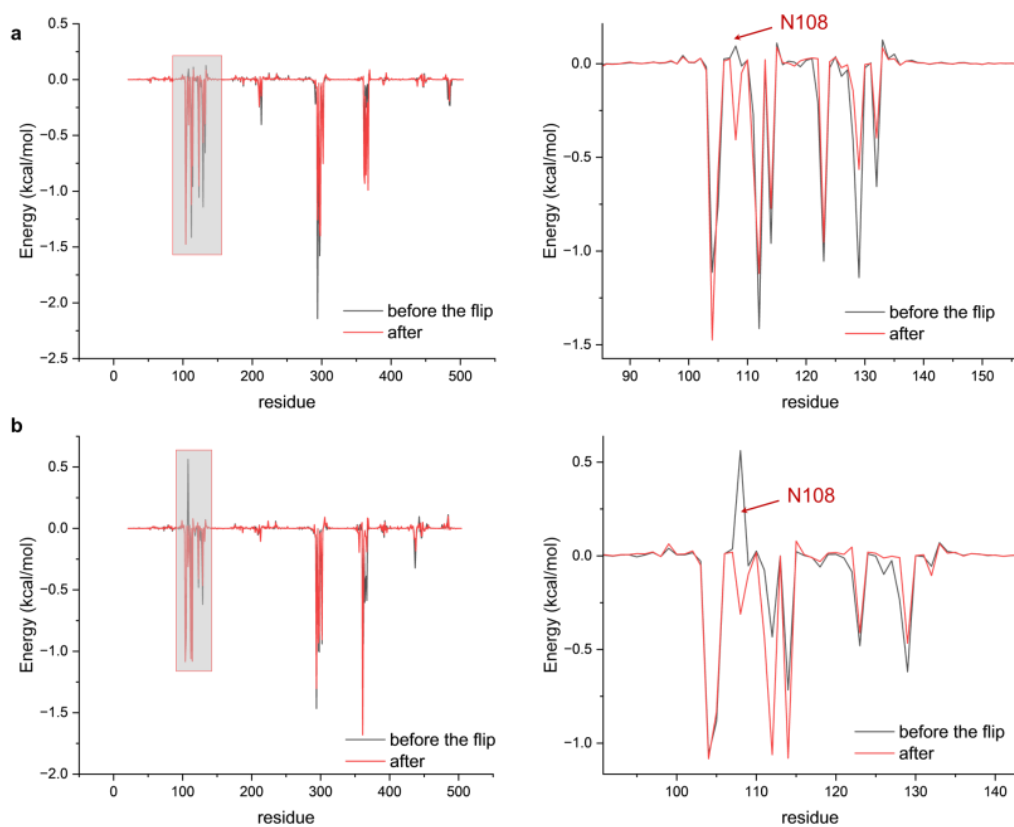

**Figure S9.** The energy decomposition analysis of (a) the C7-HLDOA-I108N model and (b) the C11-HLDOA-I108N model.

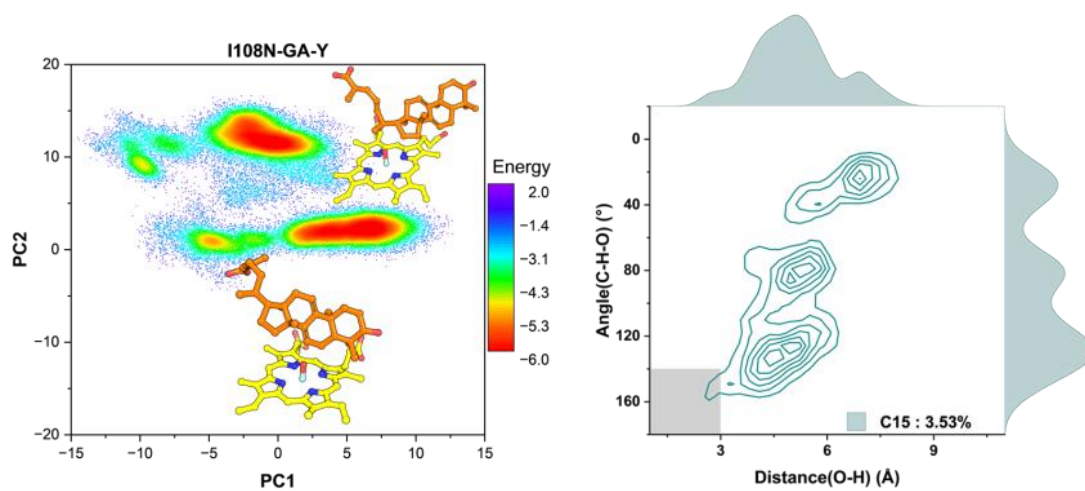

**Figure S10.** The PCA results of the substrate GA-Y in variant I108N and the PRSs occupancy of C15 site of GA-Y in variant I108N.

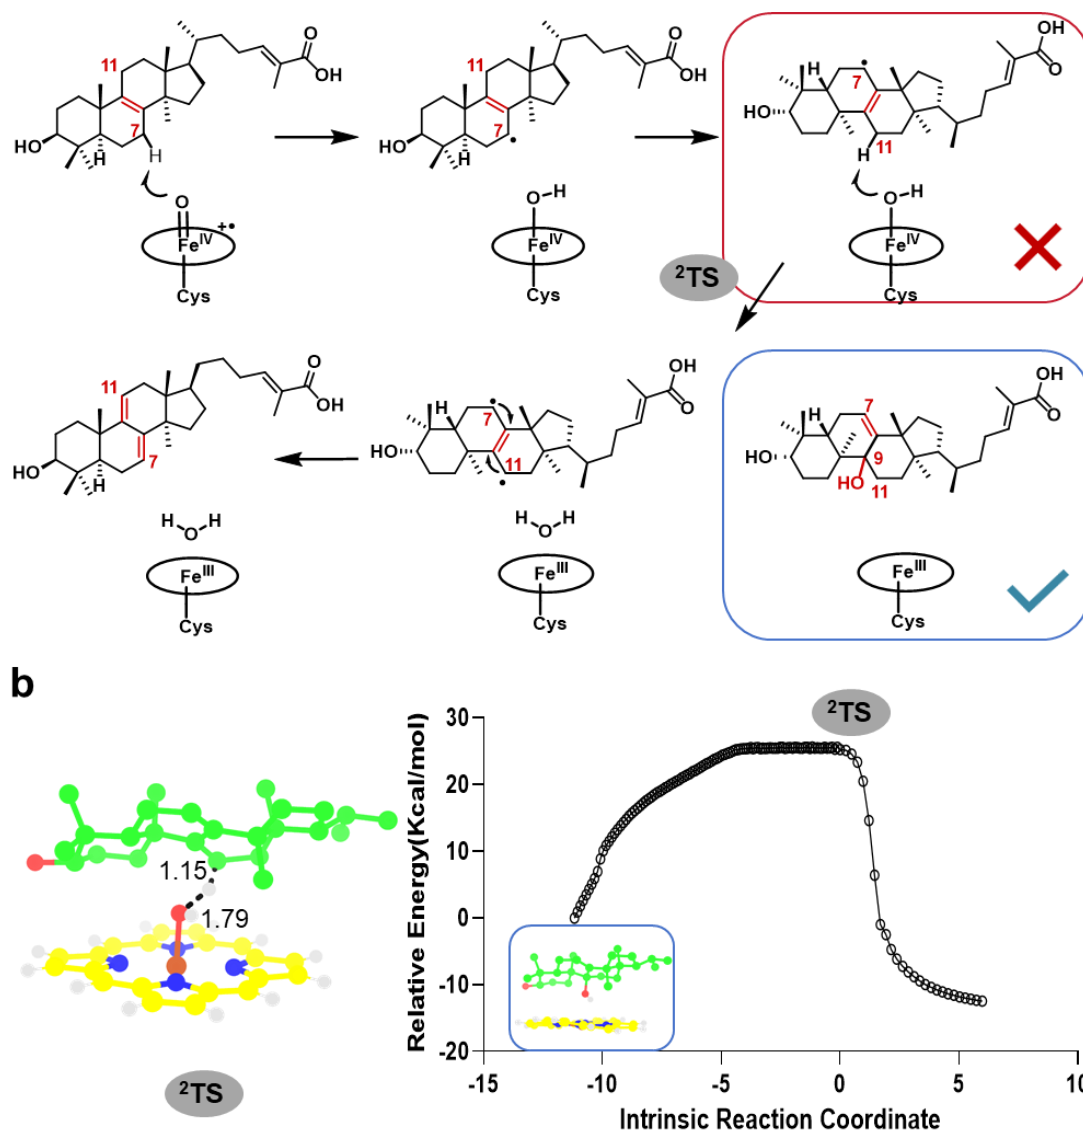

**Figure S11** Computational analysis of the C7 radical intermediate in the I108N mutant. (a) Proposed alternative reaction pathway involving conformational flipping of the C7 radical intermediate for direct C11 hydrogen abstraction. (b) Intrinsic reaction coordinate (IRC) calculations showing that the C7 radical intermediate is unstable and reverts to the hydroxyl-rebound pathway, ruling out the hypothesized C11-abstraction mechanism.

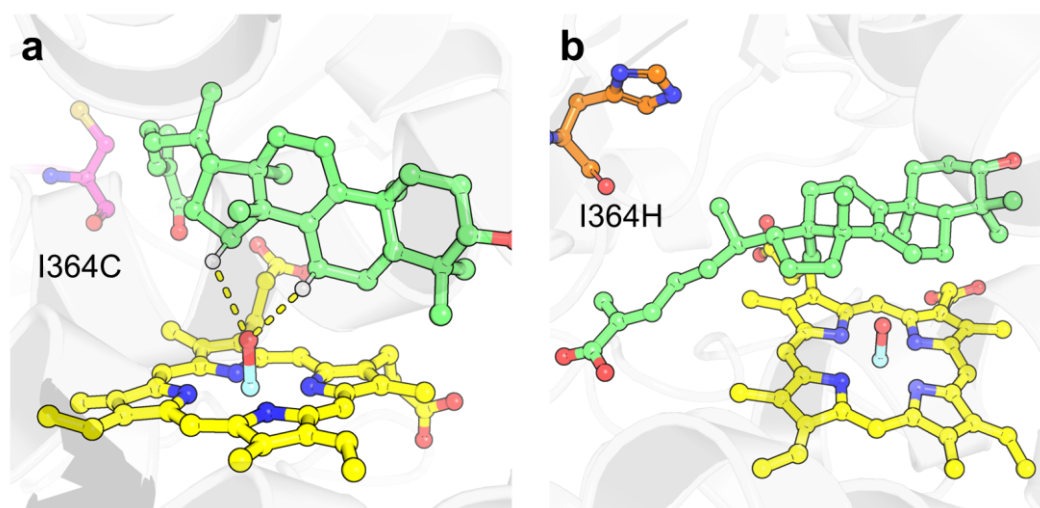

**Figure S12** The major cluster conformations of (a) I364C and (b) I364H in complex with substrate HLDOA.

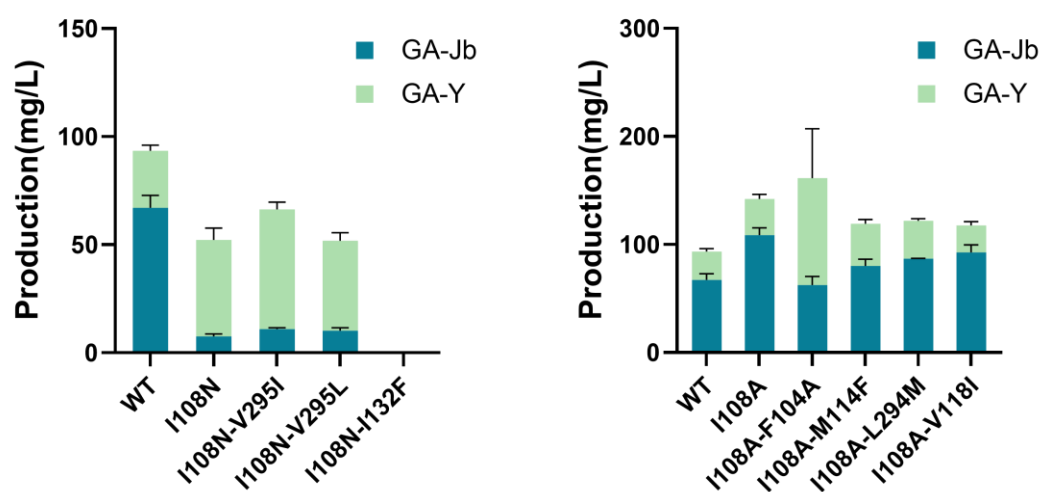

**Figure S13** The yields and product ratios of the combinatorial mutagenesis by shake flask fermentation of strains for 120 h.

## Supporting Tables

**Table S1.** The binding energy and C-O(heme) distance of CYP512W2 variants' docking results.

| Mutants       | C11 POSE                 |                    | C7 POSE                  |                   |                    |
|---------------|--------------------------|--------------------|--------------------------|-------------------|--------------------|
|               | Binding Energy(Kcal/mol) | d(C11-O(heme)) (Å) | Binding Energy(Kcal/mol) | d(C7-O(heme)) (Å) | d(C15-O(heme)) (Å) |
| I108A*        | -12.33                   | 3.4                | -12.41                   | 2.9               | 3.6                |
| I108G         | -11.75                   | 4.9                | -11.92                   | 3.1               | 2.9                |
| I108C         | -12.7                    | 3.7                | -12.84                   | 2.9               | 3.0                |
| <b>I108S</b>  | -12.84                   | 3.8                | <b>-12.98</b>            | <b>2.9</b>        | <b>2.7</b>         |
| I108D         | -12.73                   | 4.7                | -12.73                   | 2.7               | 2.8                |
| <b>I108N</b>  | <b>-13.41</b>            | <b>3.4</b>         | -12.13                   | 2.5               | 2.8                |
| M114A*        | -13.51                   | 3.7                | -13.11                   | 2.7               | 2.7                |
| M114G         | -13.47                   | 4.0                | -13.12                   | 2.9               | 2.7                |
| M114N         | -13.27                   | 3.6                | -12.91                   | 2.9               | 2.8                |
| M114S         | -12.54                   | 3.5                | -12.31                   | 2.9               | 2.7                |
| M114D         | -13.07                   | 3.3                | -12.68                   | 2.8               | 2.7                |
| <b>M114H</b>  | <b>-13.63</b>            | <b>2.9</b>         | <b>-13.18</b>            | <b>2.9</b>        | <b>2.6</b>         |
| <b>M213R*</b> | <b>-13.85</b>            | <b>4.1</b>         | <b>-13.53</b>            | <b>2.9</b>        | <b>2.6</b>         |
| M213G         | -13.71                   | 4.1                | -13.47                   | 3.0               | 2.6                |
| M213N         | -13.72                   | 4.1                | -13.53                   | 3.0               | 2.6                |
| M213P         | -13.77                   | 3.9                | -13.45                   | 2.9               | 2.7                |
| L294A*        | -13.19                   | 4.5                | -12.9                    | 3.1               | 2.6                |
| <b>L294C</b>  | -12.67                   | <b>2.7</b>         | -11.62                   | 2.9               | 3.0                |
| L294D         | -13.14                   | 2.9                | -12.15                   | 2.7               | 3.2                |
| L294G         | -13.13                   | 2.9                | -13.13                   | 2.9               | 3.0                |
| L294K         | -12.67                   | 3.8                | -11.65                   | 3.4               | 5.7                |
| <b>L294N</b>  | <b>-13.48</b>            | 4.4                | <b>-13.71</b>            | 3.0               | 2.7                |
| L294T         | -12.9                    | 3.7                | -11.98                   | 2.8               | 2.8                |
| I364A*        | -12.81                   | 4.4                | -12.91                   | 2.7               | 2.8                |
| <b>I364C</b>  | <b>-12.81</b>            | 4.3                | <b>-12.89</b>            | 2.7               | 2.8                |
| I365D         | -12.72                   | 4.4                | -12.78                   | 2.7               | 2.8                |
| I366G         | -12.76                   | 4.3                | -12.83                   | 2.7               | 2.8                |
| <b>I367H</b>  | <b>-13</b>               | 4.3                | <b>-13.06</b>            | 2.7               | 2.8                |
| <b>I368Q</b>  | <b>-12.84</b>            | 4.3                | <b>-12.91</b>            | 2.7               | 2.8                |
| I369S         | -12.8                    | 4.3                | -12.87                   | 2.7               | 2.8                |
| Y482F*        | -13.68                   | 3.9                | -13.28                   | 2.9               | 2.6                |
| Y482A         | -13.73                   | 3.8                | -13.48                   | 2.9               | 2.8                |
| <b>Y482G</b>  | <b>-13.80</b>            | 3.7                | <b>-13.64</b>            | 2.7               | 2.9                |
| Y482S         | -13.69                   | 3.7                | -13.61                   | 2.7               | 2.9                |
| <b>Y482V</b>  | <b>-13.81</b>            | 3.5                | <b>-13.64</b>            | 2.7               | 2.9                |

\*Control group (Five mutants that can either influence the catalytic activity of CYP512W2 or alter the yield of products GA-Y and GA-Jb in previous experiments).

## SUPPORTING INFORMATION

**Table S2.** Construction of plasmids.

| Plasmids                 | Construction scheme                                                                                                                                                                                                                                                                                | Primer [a]     | Primer sequence (5'-3')                  | Source     |
|--------------------------|----------------------------------------------------------------------------------------------------------------------------------------------------------------------------------------------------------------------------------------------------------------------------------------------------|----------------|------------------------------------------|------------|
| pRS426-HXT7p-FBA1t-G418r | -                                                                                                                                                                                                                                                                                                  | -              | -                                        |            |
| pRS426-CYP512W2-G418r    | -                                                                                                                                                                                                                                                                                                  | -              | -                                        |            |
| -                        | -                                                                                                                                                                                                                                                                                                  | CYP512W2-Seq-F | GCCAATACTTCACA<br>ATGTT                  | This study |
| -                        | -                                                                                                                                                                                                                                                                                                  | CYP512W2-Seq-R | TCATTTTGTTCATTG<br>ACCTT                 | This study |
| pRS426-I108C-G418r       | I108C mutant fragments 1 and 2 were cloned by primer pairs CYP512W2-F and I108C-R, I108C-F and CYP512W2-R using plasmid pRS426-CYP512W2-G418r as template. PmeI linearized plasmid pRS426-HXT7p-FBA1t-G418r was ligated with I108C mutant fragments 1 and 2 to produce plasmid pRS426-I108C-G418r. | CYP512W2-F     | TAATTTTAATCAAA<br>AAGTTTATGGCG           | This study |
|                          |                                                                                                                                                                                                                                                                                                    | I108C-R        | GACTACTTCTTCAC<br>AGCCCTCCAAGAA<br>CGATA |            |
|                          |                                                                                                                                                                                                                                                                                                    | I108C-F        | TGTGAAGAAGTAG<br>TCCACAT                 |            |
|                          |                                                                                                                                                                                                                                                                                                    | CYP512W2-R     | ATTAATTTGAATTA<br>ACGTTTTCAAGA           |            |
| pRS426-I108N-G418r       | I108N mutant fragments 1 and 2 were cloned by primer pairs CYP512W2-F and I108N-R, I108N-F and CYP512W2-R using plasmid pRS426-CYP512W2-G418r as template. PmeI linearized plasmid pRS426-HXT7p-FBA1t-G418r was ligated with I108N mutant fragments 1 and 2 to produce plasmid pRS426-I108N-G418r. | CYP512W2-F     | TAATTTTAATCAAA<br>AAGTTTATGGCG           | This study |
|                          |                                                                                                                                                                                                                                                                                                    | I108N-R        | GACTACTTCTTCAT<br>TGCCCTCCAAGAA<br>CGATA |            |
|                          |                                                                                                                                                                                                                                                                                                    | I108N-F        | AATGAAGAAGTAGT<br>CCACAT                 |            |
|                          |                                                                                                                                                                                                                                                                                                    | CYP512W2-R     | ATTAATTTGAAATT<br>AACGTTTTCAAGA          |            |
| pRS426-I108S-G418r       | I108S mutant fragments 1 and 2 were cloned by primer pairs CYP512W2-F and I108S-R, I108S-F and CYP512W2-R using plasmid pRS426-CYP512W2-G418r as template.                                                                                                                                         | CYP512W2-F     | TAATTTTAATCAAA<br>AAGTTTATGGCG           | This study |
|                          |                                                                                                                                                                                                                                                                                                    | I108S-R        | GACTACTTCTTCAT<br>TGCCCTCCAAGAA<br>CGATA |            |
|                          |                                                                                                                                                                                                                                                                                                    | I108S-F        | AATGAAGAAGTAGT<br>CCACAT                 |            |

## SUPPORTING INFORMATION

|                    |                                                                                                                                                                                                                                                                                                    |            |                                               |            |
|--------------------|----------------------------------------------------------------------------------------------------------------------------------------------------------------------------------------------------------------------------------------------------------------------------------------------------|------------|-----------------------------------------------|------------|
|                    | PmeI linearized plasmid pRS426-HXT7p-FBA1t-G418r was ligated with I108S mutant fragments 1 and 2 to produce plasmid pRS426-I108S-G418r.                                                                                                                                                            | CYP512W2-R | ATTAATTTGAATTA<br>ACGTTTTCAAGA                |            |
| pRS426-I108G-G418r | I108G mutant fragments 1 and 2 were cloned by primer pairs CYP512W2-F and I108G-R, I108G-F and CYP512W2-R using plasmid pRS426-CYP512W2-G418r as template. PmeI linearized plasmid pRS426-HXT7p-FBA1t-G418r was ligated with I108G mutant fragments 1 and 2 to produce plasmid pRS426-I108G-G418r. | CYP512W2-F | TAATTTTAATCAAA<br>AAGTTTATGGCG                |            |
|                    |                                                                                                                                                                                                                                                                                                    | I108G-R    | ATGTGGACTACTTC<br>TTCACCGCCCTCC<br>AAGAACGATA |            |
|                    |                                                                                                                                                                                                                                                                                                    | I108G-F    | GGTGAAGAAGTAG<br>TCCACAT                      | This study |
|                    |                                                                                                                                                                                                                                                                                                    | CYP512W2-R | ATTAATTTGAATTA<br>ACGTTTTCAAGA                |            |
| pRS426-I108D-G418r | I108D mutant fragments 1 and 2 were cloned by primer pairs CYP512W2-F and I108D-R, I108D-F and CYP512W2-R using plasmid pRS426-CYP512W2-G418r as template. PmeI linearized plasmid pRS426-HXT7p-FBA1t-G418r was ligated with I108D mutant fragments 1 and 2 to produce plasmid pRS426-I108D-G418r. | CYP512W2-F | TAATTTTAATCAAA<br>AAGTTTATGGCG                |            |
|                    |                                                                                                                                                                                                                                                                                                    | I108D-R    | ATGTGGACTACTTC<br>TTCATCGCCCTCCA<br>AGAACGATA |            |
|                    |                                                                                                                                                                                                                                                                                                    | I108D-F    | GATGAAGAAGTAG<br>TCCACAT                      | This study |
|                    |                                                                                                                                                                                                                                                                                                    | CYP512W2-R | ATTAATTTGAATTA<br>ACGTTTTCAAGA                |            |
| pRS426-M114H-G418r | M114H mutant fragments 1 and 2 were cloned by primer pairs CYP512W2-F and M114H-R, M114H-F and CYP512W2-R using plasmid pRS426-CYP512W2-G418r as template. PmeI linearized plasmid pRS426-HXT7p-FBA1t-G418r was ligated with M114H mutant fragments 1 and 2 to produce plasmid pRS426-M114H-G418r. | CYP512W2-F | TAATTTTAATCAAA<br>AAGTTTATGGCG                |            |
|                    |                                                                                                                                                                                                                                                                                                    | M114H-R    | GACAGTGTACTTAT<br>GGTGGACTACTTC<br>TTCAA      |            |
|                    |                                                                                                                                                                                                                                                                                                    | M114H-F    | CATAAGTACACTGT<br>CGGGC                       | This study |
|                    |                                                                                                                                                                                                                                                                                                    | CYP512W2-R | ATTAATTTGAATTA<br>ACGTTTTCAAGA                |            |

## SUPPORTING INFORMATION

|                    |                                                                                                                                                                                                                                                                                                    |            |                                              |            |
|--------------------|----------------------------------------------------------------------------------------------------------------------------------------------------------------------------------------------------------------------------------------------------------------------------------------------------|------------|----------------------------------------------|------------|
| pRS426-L294C-G418r | L294C mutant fragments 1 and 2 were cloned by primer pairs CYP512W2-F and L294C-R, L294C-F and CYP512W2-R using plasmid pRS426-CYP512W2-G418r as template. PmeI linearized plasmid pRS426-HXT7p-FBA1t-G418r was ligated with L294C mutant fragments 1 and 2 to produce plasmid pRS426-L294C-G418r. | CYP512W2-F | TAATTTTAATCAAA<br>AAGTTTATGGCG               | This study |
|                    |                                                                                                                                                                                                                                                                                                    | L294C-R    | TGCAAAGTTGACA<br>CAGAATATTCGCTC<br>GACGA     |            |
|                    |                                                                                                                                                                                                                                                                                                    | L294C-F    | TGTGTCAACTTTGC<br>AGC                        |            |
|                    |                                                                                                                                                                                                                                                                                                    | CYP512W2-R | ATTAATTTGAATTA<br>ACGTTTTCAAGA               |            |
| pRS426-L294N-G418r | L294N mutant fragments 1 and 2 were cloned by primer pairs CYP512W2-F and L294N-R, L294N-F and CYP512W2-R using plasmid pRS426-CYP512W2-G418r as template. PmeI linearized plasmid pRS426-HXT7p-FBA1t-G418r was ligated with L294N mutant fragments 1 and 2 to produce plasmid pRS426-L294N-G418r. | CYP512W2-F | TAATTTTAATCAAA<br>AAGTTTATGGCG               | This study |
|                    |                                                                                                                                                                                                                                                                                                    | L294N-R    | TGCAAAGTTGACAT<br>TGAATATTCGCTCG<br>ACGA     |            |
|                    |                                                                                                                                                                                                                                                                                                    | L294N-F    | AATGTCAACTTTGC<br>AGCC                       |            |
|                    |                                                                                                                                                                                                                                                                                                    | CYP512W2-R | ATTAATTTGAATTA<br>ACGTTTTCAAGA               |            |
| pRS426-I364C-G418r | I364C mutant fragments 1 and 2 were cloned by primer pairs CYP512W2-F and I364C-R, I364C-F and CYP512W2-R using plasmid pRS426-CYP512W2-G418r as template. PmeI linearized plasmid pRS426-HXT7p-FBA1t-G418r was ligated with I364C mutant fragments 1 and 2 to produce plasmid pRS426-I364C-G418r. | CYP512W2-F | TAATTTTAATCAAA<br>AAGTTTATGGCG               | This study |
|                    |                                                                                                                                                                                                                                                                                                    | I364C-R    | TGCGCATCAGGCC<br>ACAGAGGGAGATC<br>CCGTGGTACC |            |
|                    |                                                                                                                                                                                                                                                                                                    | I364C-F    | TGTGGCCTGATGC<br>GCAAGTCCGT                  |            |
|                    |                                                                                                                                                                                                                                                                                                    | CYP512W2-R | ATTAATTTGAATTA<br>ACGTTTTCAAGA               |            |
| pRS426-I364H-G418r | I364H mutant fragments 1 and 2 were cloned by primer pairs CYP512W2-F and I364H-R, I364H-F and CYP512W2-R                                                                                                                                                                                          | CYP512W2-F | TAATTTTAATCAAA<br>AAGTTTATGGCG               | This study |
|                    |                                                                                                                                                                                                                                                                                                    | I364H-R    | TGCGCATCAGGCC<br>ATGGAGGGAGATC<br>CCGTGGTACC |            |

## SUPPORTING INFORMATION

|                    |                                                                                                                                                                                                                                                                                                           |            |                                              |            |
|--------------------|-----------------------------------------------------------------------------------------------------------------------------------------------------------------------------------------------------------------------------------------------------------------------------------------------------------|------------|----------------------------------------------|------------|
|                    | using plasmid pRS426-CYP512W2-G418r as template. PmeI linearized plasmid pRS426-HXT7p-FBA1t-G418r was ligated with I364H mutant fragments 1 and 2 to produce plasmid pRS426-I364H-G418r.                                                                                                                  | I364H-F    | CATGGCCTGATGC<br>GCAAGTCCGT                  |            |
|                    |                                                                                                                                                                                                                                                                                                           | CYP512W2-R | ATTAATTTGAATTA<br>ACGTTTTCAAGA               |            |
| pRS426-I364Q-G418r | I364Q mutant fragments 1 and 2 were cloned by primer pairs CYP512W2-F and I364Q-R, I364Q-F and CYP512W2-R using plasmid pRS426-CYP512W2-G418r as template. PmeI linearized plasmid pRS426-HXT7p-FBA1t-G418r was ligated with I364Q mutant fragments 1 and 2 to produce plasmid pRS426-I364Q-G418r.        | CYP512W2-F | TAATTTTAATCAAA<br>AAGTTTATGGCG               |            |
|                    |                                                                                                                                                                                                                                                                                                           | I364Q-R    | TGCGCATCAGGCC<br>TTGGAGGGAGATC<br>CCGTGGTACC |            |
|                    |                                                                                                                                                                                                                                                                                                           | I364Q-F    | CAAGGCCTGATGC<br>GCAAGTCCGT                  | This study |
|                    |                                                                                                                                                                                                                                                                                                           | CYP512W2-R | ATTAATTTGAATTA<br>ACGTTTTCAAGA               |            |
| pRS426-Y482V-G418r | Y482V mutant fragments 1 and 2 were cloned by primer pairs CYP512W2-F and Y482V-R, Y482V-F and SacII-R using plasmid pRS426-CYP512W2-G418r as template. PmeI and SacII linearized plasmid pRS426-HXT7p-FBA1t-G418r was ligated with Y482V mutant fragments 1 and 2 to produce plasmid pRS426-Y482V-G418r. | CYP512W2-F | TAATTTTAATCAAA<br>AAGTTTATGGCG               |            |
|                    |                                                                                                                                                                                                                                                                                                           | Y482V-R    | GACGTTTCGTGCCA<br>ACGTAAAAGTTTCG<br>CCGGCC   |            |
|                    |                                                                                                                                                                                                                                                                                                           | Y482V-F    | GTTGGCACGAACG<br>TCGT                        | This study |
|                    |                                                                                                                                                                                                                                                                                                           | SacII-R    | AAGCTGGAGCTCC<br>ACCGCGG                     |            |
| pRS426-Y482G-G418r | Y482G mutant fragments 1 and 2 were cloned by primer pairs CYP512W2-F and Y482G-R, Y482G-F and SacII-R using plasmid pRS426-CYP512W2-G418r as template. PmeI and SacII linearized plasmid pRS426-HXT7p-FBA1t-G418r was ligated with Y482G mutant fragments 1 and 2 to                                     | CYP512W2-F | TAATTTTAATCAAA<br>AAGTTTATGGCG               |            |
|                    |                                                                                                                                                                                                                                                                                                           | Y482G-R    | GACGTTTCGTGCCA<br>CCGTAAAAGTTTCG<br>CCGGCC   |            |
|                    |                                                                                                                                                                                                                                                                                                           | Y482G-F    | GGTGGCACGAACG<br>TCGT                        | This study |
|                    |                                                                                                                                                                                                                                                                                                           | SacII-R    | AAGCTGGAGCTCC<br>ACCGCGG                     |            |

## SUPPORTING INFORMATION

---

produce plasmid  
pRS426-Y482G-  
G418r.

---

## SUPPORTING INFORMATION

**Table S3.** Strains used in this study.

| Strains                     | Description                                      | Source        |
|-----------------------------|--------------------------------------------------|---------------|
| <i>E. coli</i> DH5 $\alpha$ | General cloning host.                            | TaKaRa, Japan |
| SC62                        | YL-T3-rDNA::eGFP-TRP1-CYP5150L8-iGLCPR.          | [12]          |
| SC62-CK                     | SC62 harboring plasmid pRS426-HXT7p-FBA1t-G418r. | This study    |
| SC62-WT                     | SC62 harboring plasmid pRS426-CYP512W2-G418r.    | This study    |
| SC62-I108S                  | SC62 harboring plasmid pRS426-I108S-G418r.       | This study    |
| SC62-I108N                  | SC62 harboring plasmid pRS426-I108N-G418r.       | This study    |
| SC62-I108C                  | SC62 harboring plasmid pRS426-I108C-G418r.       | This study    |
| SC62-I108G                  | SC62 harboring plasmid pRS426-I108G-G418r.       | This study    |
| SC62-I108D                  | SC62 harboring plasmid pRS426-I108D-G418r.       | This study    |
| SC62-M114H                  | SC62 harboring plasmid pRS426-M114H-G418r.       | This study    |
| SC62-L294C                  | SC62 harboring plasmid pRS426-L294C-G418r.       | This study    |
| SC62-L294N                  | SC62 harboring plasmid pRS426-L294N-G418r.       | This study    |
| SC62-I364C                  | SC62 harboring plasmid pRS426-I364C-G418r.       | This study    |
| SC62-I364H                  | SC62 harboring plasmid pRS426-I364H-G418r.       | This study    |
| SC62-I364Q                  | SC62 harboring plasmid pRS426-I364Q-G418r.       | This study    |
| SC62-Y482V                  | SC62 harboring plasmid pRS426-Y482V-G418r.       | This study    |
| SC62-Y482G                  | SC62 harboring plasmid pRS426-Y482G-G418r.       | This study    |

## SUPPORTING INFORMATION

**Table S4.** Product ratio of Diverse Mutants to Generate GA-Jb and GA-Y.

|                                                                  | Product ratio of GA-Jb / GA-Y (%) <sup>a</sup> |                   |                   |                   |
|------------------------------------------------------------------|------------------------------------------------|-------------------|-------------------|-------------------|
|                                                                  | 48 h                                           | 72 h              | 96 h              | 120 h             |
| WT                                                               | 70.7/29.3                                      | 70.2/29.8         | 72.7/27.3         | 76.4/23.6         |
| I108S                                                            | 46.7*** / 53.3***                              | 59.8*** / 40.2*** | 61.7*** / 38.3*** | 63.2*** / 36.8*** |
| I108N                                                            | 9.6*** / 90.4%***                              | 11.1*** / 88.9*** | 16.9*** / 83.1*** | 20.8*** / 79.2*** |
| M114H                                                            | 36.9*** / 63.1***                              | 48.9*** / 51.1*** | 48.1*** / 51.9*** | 50.3*** / 49.7*** |
| L294C                                                            | 64.9*** / 35.1***                              | 72.0* / 28.0*     | 73.9** / 26.1     | 75.0** / 25.0     |
| L294N                                                            | 53.9*** / 46.1***                              | 66.1 / 33.9       | 68.3** / 31.7**   | 70.5** / 29.5**   |
| I364H                                                            | 8.3*** / 91.7***                               | 12.2*** / 87.8*** | 13.4*** / 86.6*** | 14.6*** / 85.4*** |
| I364C                                                            | 64.5*** / 35.5***                              | 72.0* / 28.0*     | 75.8* / 24.2*     | 77.0 / 23.0       |
| I364Q                                                            | 14.1*** / 85.9***                              | 18.7*** / 81.3*** | 20.8*** / 79.2*** | 22.3*** / 77.7*** |
| Y482V                                                            | 56.8*** / 43.2***                              | 64.8*** / 35.2*** | 67.0** / 33.0**   | 68.7*** / 31.3*** |
| Y482G                                                            | 60.4*** / 39.6***                              | 67.5** / 32.5**   | 67.9** / 32.1**   | 70.6** / 29.4**   |
| I108A                                                            | 63.9*** / 36.1***                              | 74.0** / 26.0**   | 81.1*** / 18.9*** | 84.8*** / 15.2*** |
| I108C                                                            | 55.5** / 44.5**                                | 62.5*** / 37.5*** | 60.7*** / 39.3*** | 60.1*** / 39.9*** |
| I108D                                                            | 0.0*** / 0.0***                                | 0.0*** / 100.0*** | 0.0*** / 100.0*** | 0.0*** / 100.0*** |
| I108G                                                            | 40.4*** / 59.6***                              | 47.4** / 52.6**   | 50.9*** / 49.1*** | 52.0*** / 48.0*** |
| Production of GA-Jb / GA-Y as compared with SC62-WT <sup>b</sup> |                                                |                   |                   |                   |
|                                                                  | 48 h                                           | 72 h              | 96 h              | 120 h             |
| WT                                                               | 1.00 / 1.00                                    | 1.00 / 1.00       | 1.00 / 1.00       | 1.00 / 1.00       |
| I108S                                                            | 0.53*** / 1.46*                                | 1.21 / 1.92***    | 1.50*** / 2.48*** | 1.30** / 2.45***  |
| I108N                                                            | 0.04*** / 0.83                                 | 0.09** / 1.74**   | 0.20*** / 2.56*** | 0.20*** / 2.50*** |
| M114H                                                            | 0.23*** / 0.95                                 | 0.59** / 1.46*    | 0.70*** / 1.99*** | 0.65*** / 1.46*** |
| L294C                                                            | 0.77** / 1.01                                  | 1.30* / 1.20      | 1.38*** / 1.30*   | 1.27*** / 1.37*   |
| L294N                                                            | 0.52*** / 1.08*                                | 1.21 / 1.47*      | 1.17 / 1.45*      | 1.14 / 1.56*      |
| I364H                                                            | 0.03*** / 0.88                                 | 0.10** / 1.67***  | 0.13*** / 2.28*** | 0.13*** / 2.51*** |
| I364C                                                            | 0.66** / 0.88                                  | 1.21 / 1.12       | 1.39** / 1.19     | 1.33*** / 1.29*   |
| I364Q                                                            | 0.04*** / 0.71                                 | 0.12** / 1.28     | 0.18*** / 1.89    | 0.16*** / 1.89    |
| Y482V                                                            | 0.68** / 1.24*                                 | 1.19 / 1.53*      | 1.20 / 1.57*      | 1.08 / 1.59**     |
| Y482G                                                            | 0.63** / 1.00                                  | 1.19 / 1.36**     | 1.22* / 1.54**    | 1.03 / 1.38**     |
| I108A                                                            | 0.68** / 0.93                                  | 1.12 / 0.93       | 1.80*** / 1.11    | 1.77** / 1.03     |
| I108C                                                            | 0.59** / 1.14                                  | 1.15 / 1.64**     | 1.44** / 2.47***  | 1.12* / 2.42***   |
| I108D                                                            | 0.00*** / 0.02***                              | 0.00** / 0.07***  | 0.00*** / 0.12*** | 0.00*** / 0.12**  |
| I108G                                                            | 0.39*** / 1.41*                                | 0.85 / 2.26**     | 1.22 / 3.13***    | 0.95 / 2.87**     |

<sup>a</sup> Product ratio of GA-Jb or GA-Y titers in the total titers of GA-Jb and GA-Y. <sup>b</sup> Production of GA-Jb/GA-Y as compared with SC62-WT refers to the ratio of the GA-Jb/Y production titer of the mutant to that of the WT. \* $p < 0.05$ ; \*\* $p < 0.01$ ; \*\*\* $p < 0.001$ .

## SUPPORTING INFORMATION

**Table S5.** The percentage of PRSs in three MD simulations in WT and its variants I108A/S/G.

|       | C7 pose (%)              |                         |       | C11 pose (%)              |                          |       | C15 pose(%)               |                          |       |
|-------|--------------------------|-------------------------|-------|---------------------------|--------------------------|-------|---------------------------|--------------------------|-------|
|       | H $\alpha$ <sub>C7</sub> | H $\beta$ <sub>C7</sub> | total | H $\alpha$ <sub>C11</sub> | H $\beta$ <sub>C11</sub> | total | H $\alpha$ <sub>C15</sub> | H $\beta$ <sub>C15</sub> | total |
| WT    | 5.4                      | 7.7                     | 13.1  | 0.0                       | 9.0                      | 9.0   | 10.8                      | 0.4                      | 11.2  |
| I108A | 22.5                     | 5.1                     | 27.6  | 0.1                       | 13.6                     | 13.7  | 18.9                      | 1.4                      | 20.3  |
| I108S | 15.8                     | 1.1                     | 16.9  | 0.0                       | 9.7                      | 9.7   | 24.7                      | 0.0                      | 24.7  |
| I108G | 20.2                     | 1.3                     | 21.5  | 4.3                       | 6.8                      | 11.1  | 13.6                      | 0.0                      | 13.6  |

**Table S6.** The binding energy of CYP512W2 mutants calculated by MM/GBSA.

| Systems    | Binding Energy(kcal/mol) |
|------------|--------------------------|
| WT-GA-Y    | -33.1 $\pm$ 2.9          |
| I108A-GA-Y | -36.6 $\pm$ 4.5          |
| I108S-GA-Y | -36.3 $\pm$ 2.6          |
| I108G-GA-Y | -38.8 $\pm$ 3.7          |
| I108N-GA-Y | -30.5 $\pm$ 3.0          |
